# Supplementary material for: Role of m⁶A-Modified GAS6 in Rheumatoid Arthritis: Insights from Multi-Omics Analysis
Source: Research Square preprint supplement (doi:10.21203/rs.3.rs-7993179/v1), 2025-12-10
Supplement: Supplementary file 1 [file c668bf3201c93af7485920ac.pdf]

|   |                            |
|---|----------------------------|
| A | HC                         |
| B | RA Patients                |
| C | RA+drug intervention group |

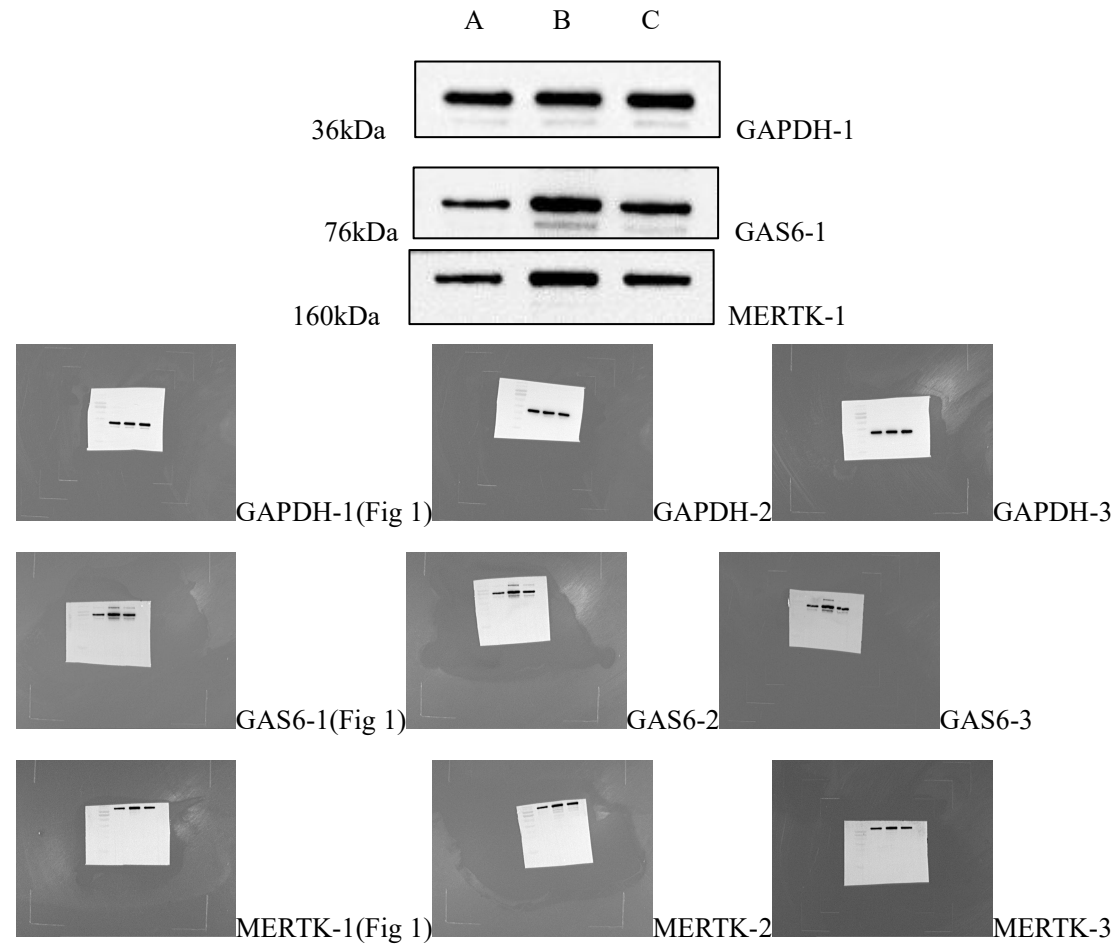

Note: We indeed designed three experimental groups for this study: A (HC), B (RA Patients), and C (Drug intervention group). In Figure 4 of the article, we focused on elucidating the core mechanisms and thus only displayed the bands from groups A and B, which were directly used for comparing the fundamental mechanisms.
